# Supplementary material
Source: MDPI journal article supplement (https://www.mdpi.com/search?q=molecules-24-02330)
Supplement: s001 [file molecules-24-02330-s001.pdf]

# Metabolic Profiling of Water-Soluble Compounds from the Extracts of Dark Septate Endophytic Fungi (DSE) Isolated from Scots Pine (*Pinus sylvestris* L.) Seedlings Using UPLC–Orbitrap–MS

Jenni Tienaho <sup>1,2,\*</sup>, Maarit Karonen <sup>3</sup>, Riina Muilu–Mäkelä <sup>2</sup>, Kristiina Wähälä <sup>4</sup>, Eduardo Leon Denegri <sup>4</sup>, Robert Franzén <sup>5</sup>, Matti Karp <sup>1</sup>, Ville Santala <sup>1</sup> and Tytti Sarjala <sup>2</sup>

<sup>1</sup> Faculty of Natural Sciences and Engineering, Tampere University, FI-33101 Tampere, Finland; karpmatti1@gmail.com (M.K.); ville.santala@tuni.fi (V.S.)

<sup>2</sup> Natural Resources Institute Finland (Luke), FI-00791 Helsinki, Finland; riina.muilu-makela@luke.fi (R.M.-M.); tytti.sarjala@luke.fi (T.S.)

<sup>3</sup> Natural Chemistry Research Group, Department of Chemistry, University of Turku, FI-20014 Turku, Finland; maarit.karonen@utu.fi

<sup>4</sup> Department of Chemistry, University of Helsinki, FI-00014 Helsinki, Finland; kristiina.wahala@helsinki.fi; (K.W.); eleondenegri@outlook.com (E.L.D.)

<sup>5</sup> School of Chemical Engineering, Department of Chemistry and Materials Science, Aalto University, FI-00076 Espoo, Finland; robert.franzen@aalto.fi

\* Correspondence: jenni.tienaho@tuni.fi or jenni.tienaho@luke.fi; Tel.: +358-29-532-4986

**Table S1.** The unidentified metabolites. The intensity of the metabolite in the corresponding fungi extract is shown under the fungal species codes. Intensities over  $1 \times 10^7$  are shown in black whereas lower intensities with a grey color. Other ions are also shown if detected. \* = Was also detected but not identified by Sun et al. [26]. nd = not detected.

| #  | rt   | [M + H] <sup>+</sup> | [M – H] <sup>-</sup> | Exact Mass Measured | A                 | R                 | S16               | Other Ions                                                            |
|----|------|----------------------|----------------------|---------------------|-------------------|-------------------|-------------------|-----------------------------------------------------------------------|
| 1  | 0.40 | 274                  | 272                  | 273.96623*          | 5×10 <sup>7</sup> | 8×10 <sup>6</sup> | 8×10 <sup>6</sup> |                                                                       |
| 2  | 0.40 | 388                  | 386                  | 387.94673*          | 3×10 <sup>7</sup> | 2×10 <sup>6</sup> | 3×10 <sup>5</sup> |                                                                       |
| 3  | 0.40 | 518                  | 516                  | 517.90331           | 5×10 <sup>6</sup> | 2×10 <sup>5</sup> | nd                |                                                                       |
| 4  | 0.41 | 218                  | 216                  | 217.97572*          | 1×10 <sup>7</sup> | 1×10 <sup>6</sup> | 1×10 <sup>7</sup> |                                                                       |
| 5  | 0.46 | nd                   | 257                  | 258.07335           | 6×10 <sup>6</sup> | 1×10 <sup>7</sup> | 3×10 <sup>6</sup> |                                                                       |
| 6  | 0.46 | 387                  | 385                  | 386.18007           | 7×10 <sup>5</sup> | 7×10 <sup>6</sup> | 7×10 <sup>5</sup> |                                                                       |
| 7  | 0.47 | 251                  | 249                  | 250.02328           | 1×10 <sup>7</sup> | 3×10 <sup>7</sup> | 1×10 <sup>7</sup> |                                                                       |
| 8  | 0.49 | 308                  | 306                  | 307.21086           | 6×10 <sup>4</sup> | 2×10 <sup>5</sup> | 7×10 <sup>4</sup> |                                                                       |
| 9  | 0.50 | nd                   | 194                  | 195.95317           | 6×10 <sup>6</sup> | 5×10 <sup>6</sup> | 1×10 <sup>7</sup> |                                                                       |
| 10 | 0.53 | 219                  | nd                   | 218.01907           | 2×10 <sup>7</sup> | 2×10 <sup>7</sup> | 7×10 <sup>7</sup> |                                                                       |
| 11 | 0.53 | 329                  | 327                  | 328.14845           | 4×10 <sup>7</sup> | 6×10 <sup>7</sup> | 1×10 <sup>7</sup> |                                                                       |
| 12 | 0.53 | nd                   | 371                  | 372.14400           | 1×10 <sup>7</sup> | 5×10 <sup>7</sup> | 9×10 <sup>6</sup> |                                                                       |
| 13 | 0.53 | nd                   | 396                  | 397.13561           | 2×10 <sup>6</sup> | 2×10 <sup>6</sup> | 8×10 <sup>6</sup> |                                                                       |
| 14 | 0.54 | nd                   | 217                  | 218.05522           | 8×10 <sup>8</sup> | 8×10 <sup>8</sup> | 6×10 <sup>8</sup> |                                                                       |
| 15 | 0.54 | 221                  | 219                  | 220.03447           | 2×10 <sup>7</sup> | 2×10 <sup>8</sup> | 2×10 <sup>8</sup> |                                                                       |
| 16 | 0.54 | 281                  | 279                  | 280.05580           | 1×10 <sup>8</sup> | 1×10 <sup>8</sup> | 1×10 <sup>8</sup> |                                                                       |
| 17 | 0.55 | 441                  | 439                  | 440.09453           | 1×10 <sup>8</sup> | 7×10 <sup>7</sup> | 7×10 <sup>6</sup> |                                                                       |
| 18 | 0.56 | 353                  | 351                  | 352.14891           | 4×10 <sup>5</sup> | 7×10 <sup>5</sup> | 9×10 <sup>5</sup> |                                                                       |
| 19 | 0.58 | 358                  | nd                   | 357.16752           | 4×10 <sup>8</sup> | 4×10 <sup>8</sup> | 3×10 <sup>8</sup> |                                                                       |
| 20 | 0.60 | nd                   | 194                  | 195.95305           | 4×10 <sup>7</sup> | 4×10 <sup>7</sup> | 9×10 <sup>7</sup> |                                                                       |
| 21 | 0.61 | 353                  | 351                  | 352.14790           | 7×10 <sup>5</sup> | 1×10 <sup>6</sup> | 1×10 <sup>6</sup> |                                                                       |
| 22 | 0.70 | nd                   | 238                  | 239.89826           | 2×10 <sup>7</sup> | 1×10 <sup>7</sup> | 6×10 <sup>4</sup> |                                                                       |
| 23 | 0.70 | 323                  | 321                  | 322.13713           | 2×10 <sup>5</sup> | 2×10 <sup>6</sup> | 4×10 <sup>5</sup> |                                                                       |
| 24 | 0.71 | 265                  | 263                  | 264.11391           | 9×10 <sup>5</sup> | 2×10 <sup>6</sup> | 4×10 <sup>5</sup> |                                                                       |
| 25 | 0.73 | 286                  | 284                  | 287.15767           | 2×10 <sup>8</sup> | 2×10 <sup>8</sup> | 3×10 <sup>7</sup> |                                                                       |
| 26 | 0.74 | 240                  | 238                  | 239.89876           | 2×10 <sup>7</sup> | 1×10 <sup>7</sup> | 1×10 <sup>5</sup> |                                                                       |
| 27 | 0.81 | 409                  | 407                  | 408.17357           | 1×10 <sup>6</sup> | 4×10 <sup>6</sup> | 1×10 <sup>6</sup> |                                                                       |
| 28 | 0.87 | 274                  | 272                  | 273.08436           | 3×10 <sup>6</sup> | 1×10 <sup>7</sup> | 6×10 <sup>6</sup> |                                                                       |
| 29 | 0.96 | 274                  | 272                  | 273.08439           | 3×10 <sup>6</sup> | 8×10 <sup>6</sup> | 4×10 <sup>6</sup> |                                                                       |
| 30 | 0.98 | nd                   | 522                  | 523.13210           | 3×10 <sup>5</sup> | 6×10 <sup>6</sup> | 5×10 <sup>4</sup> |                                                                       |
| 31 | 1.05 | nd                   | 675                  | 676.20680           | 9×10 <sup>5</sup> | nd                | nd                |                                                                       |
| 32 | 1.19 | 409                  | 407                  | 408.17412           | 1×10 <sup>6</sup> | 1×10 <sup>6</sup> | 8×10 <sup>5</sup> |                                                                       |
| 33 | 1.21 | 409                  | 407                  | 408.17412           | 5×10 <sup>5</sup> | 3×10 <sup>6</sup> | 6×10 <sup>5</sup> |                                                                       |
| 34 | 1.28 | 588                  | 586                  | 587.10512           | nd                | nd                | 9×10 <sup>5</sup> |                                                                       |
| 35 | 1.35 | 240                  | 238                  | 239.89890           | 2×10 <sup>6</sup> | 9×10 <sup>5</sup> | 2×10 <sup>5</sup> |                                                                       |
| 36 | 1.74 | 280                  | 278                  | 279.13032           | 4×10 <sup>6</sup> | 3×10 <sup>6</sup> | 8×10 <sup>6</sup> |                                                                       |
| 37 | 1.75 | 714                  | 712                  | 713.21584           | 1×10 <sup>5</sup> | nd                | nd                |                                                                       |
| 38 | 1.78 | 239                  | 237                  | 238.10523           | 1×10 <sup>8</sup> | 3×10 <sup>7</sup> | 3×10 <sup>5</sup> |                                                                       |
| 39 | 1.78 | 550                  | 548                  | 549.11226           | 1×10 <sup>7</sup> | 3×10 <sup>7</sup> | 3×10 <sup>7</sup> | 1099.22937 [2M + H] <sup>+</sup> ; 1097.34277 [2M – H] <sup>-</sup>   |
| 40 | 1.78 | 621                  | 619                  | 620.11598           | 8×10 <sup>6</sup> | 2×10 <sup>7</sup> | 2×10 <sup>7</sup> |                                                                       |
| 41 | 1.79 | 221                  | 219                  | 220.09434           | 8×10 <sup>6</sup> | 2×10 <sup>6</sup> | 6×10 <sup>5</sup> |                                                                       |
| 42 | 1.85 | 501                  | 499                  | 500.02419           | 3×10 <sup>7</sup> | 5×10 <sup>7</sup> | 6×10 <sup>7</sup> |                                                                       |
| 43 | 1.90 | 430                  | nd                   | 429.10509           | 4×10 <sup>5</sup> | 5×10 <sup>6</sup> | 6×10 <sup>5</sup> |                                                                       |
| 44 | 1.93 | 219                  | nd                   | 218.10373           | 1×10 <sup>7</sup> | nd                | 1×10 <sup>6</sup> |                                                                       |
| 45 | 1.98 | nd                   | 287                  | 288.09615           | 1×10 <sup>7</sup> | 2×10 <sup>7</sup> | 8×10 <sup>6</sup> |                                                                       |
| 46 | 1.98 | 428                  | 426                  | 427.56868           | 7×10 <sup>6</sup> | 2×10 <sup>7</sup> | 7×10 <sup>6</sup> |                                                                       |
| 47 | 1.99 | 551                  | 549                  | 550.09609           | 6×10 <sup>7</sup> | 3×10 <sup>8</sup> | 2×10 <sup>8</sup> |                                                                       |
| 48 | 2.02 | 430                  | nd                   | 429.10518           | 7×10 <sup>6</sup> | 2×10 <sup>7</sup> | 7×10 <sup>6</sup> |                                                                       |
| 49 | 2.04 | 2630                 | 2628                 | 2629.83072          | 1×10 <sup>5</sup> | 2×10 <sup>5</sup> | 6×10 <sup>5</sup> | 1315.92264 [M + 2H] <sup>2+</sup> ; 1313.90808 [M – 2H] <sup>2-</sup> |
| 50 | 2.04 | nd                   | 2674                 | 2675.83414          | 3×10 <sup>4</sup> | 9×10 <sup>4</sup> | 2×10 <sup>5</sup> | 1336.90979 [M – 2H] <sup>2-</sup>                                     |
| 51 | 2.05 | 636                  | 634                  | 635.11345           | 1×10 <sup>7</sup> | 3×10 <sup>7</sup> | 9×10 <sup>6</sup> |                                                                       |
| 52 | 2.05 | 557                  | 555                  | 556.14305           | 5×10 <sup>6</sup> | 6×10 <sup>6</sup> | 7×10 <sup>6</sup> |                                                                       |
| 53 | 2.06 | 284                  | 282                  | 283.11683           | 6×10 <sup>6</sup> | 5×10 <sup>6</sup> | 5×10 <sup>7</sup> |                                                                       |
| 54 | 2.06 | 430                  | 428                  | 429.10496           | 3×10 <sup>6</sup> | 1×10 <sup>7</sup> | 3×10 <sup>6</sup> |                                                                       |
| 55 | 2.09 | 521                  | 519                  | 520.22252           | nd                | nd                | 5×10 <sup>6</sup> |                                                                       |
| 56 | 2.12 | 283                  | nd                   | 282.07945           | 1×10 <sup>7</sup> | 3×10 <sup>7</sup> | 1×10 <sup>7</sup> | 565.16650 [2M + H] <sup>+</sup> ; 563.15295 [2M – H] <sup>-</sup>     |
| 57 | 2.12 | 398                  | 396                  | 397.13389           | 8×10 <sup>7</sup> | 7×10 <sup>7</sup> | 4×10 <sup>7</sup> |                                                                       |
| 58 | 2.12 | 532                  | 530                  | 531.13646           | 3×10 <sup>6</sup> | 1×10 <sup>7</sup> | 3×10 <sup>6</sup> |                                                                       |
| 59 | 2.15 | 280                  | 278                  | 279.12977           | 2×10 <sup>7</sup> | 2×10 <sup>7</sup> | 5×10 <sup>6</sup> |                                                                       |

|    |      |      |      |            |                   |                   |                   |                                                                     |
|----|------|------|------|------------|-------------------|-------------------|-------------------|---------------------------------------------------------------------|
| 60 | 2.15 | 379  | 377  | 378.10960  | nd                | 7×10 <sup>6</sup> | nd                |                                                                     |
| 61 | 2.19 | 232  | nd   | 231.14696  | 2×10 <sup>8</sup> | 2×10 <sup>8</sup> | 1×10 <sup>9</sup> |                                                                     |
| 62 | 2.19 | 429  | 427  | 428.06072  | 3×10 <sup>6</sup> | 3×10 <sup>7</sup> | 2×10 <sup>7</sup> | 857.12567 [2M + H] <sup>+</sup> ; 855.11475 [2M – H] <sup>-</sup>   |
| 63 | 2.29 | 532  | 530  | 531.13615  | 7×10 <sup>6</sup> | 2×10 <sup>7</sup> | 9×10 <sup>6</sup> |                                                                     |
| 64 | 2.32 | 556  | 554  | 555.14738  | 3×10 <sup>7</sup> | 5×10 <sup>7</sup> | 2×10 <sup>7</sup> |                                                                     |
| 65 | 2.34 | 627  | 625  | 626.10191  | 4×10 <sup>7</sup> | 2×10 <sup>8</sup> | 4×10 <sup>7</sup> |                                                                     |
| 66 | 2.35 | 572  | 570  | 571.14232  | 1×10 <sup>7</sup> | 1×10 <sup>7</sup> | 1×10 <sup>7</sup> | 1143.28784 [2M + H] <sup>+</sup> ; 1141.27905 [2M – H] <sup>-</sup> |
| 67 | 2.38 | 435  | 433  | 434.10237  | 1×10 <sup>6</sup> | 7×10 <sup>5</sup> | 1×10 <sup>6</sup> |                                                                     |
| 68 | 2.40 | 458  | 456  | 457.57568  | 1×10 <sup>7</sup> | 2×10 <sup>7</sup> | 1×10 <sup>7</sup> |                                                                     |
| 69 | 2.49 | 418  | 416  | 417.59318  | 1×10 <sup>6</sup> | 3×10 <sup>6</sup> | 2×10 <sup>6</sup> | 836.18762 [2M + H] <sup>+</sup> ; 834.17896 [2M – H] <sup>-</sup>   |
| 70 | 2.50 | 217  | 215  | 216.08989  | nd                | 5×10 <sup>5</sup> | nd                |                                                                     |
| 71 | 2.61 | 1149 | 1147 | 1148.24490 | 3×10 <sup>5</sup> | 1×10 <sup>5</sup> | 2×10 <sup>6</sup> | 575.12973 [M + 2H] <sup>2+</sup> ; 573.11517 [M – 2H] <sup>2-</sup> |
| 72 | 2.62 | 860  | 858  | 859.19628  | 1×10 <sup>6</sup> | 1×10 <sup>6</sup> | 2×10 <sup>6</sup> |                                                                     |
| 73 | 2.63 | 1125 | 1123 | 1124.23156 | 4×10 <sup>5</sup> | 3×10 <sup>5</sup> | 1×10 <sup>6</sup> | 563.12306 [M + 2H] <sup>2+</sup> ; 561.10850 [M – 2H] <sup>2-</sup> |
| 74 | 2.64 | 1173 | 1171 | 1172.25456 | nd                | nd                | 4×10 <sup>5</sup> | 587.13456 [M + 2H] <sup>2+</sup> ; 585.12000 [M – 2H] <sup>2-</sup> |
| 75 | 2.67 | 836  | 834  | 835.18477  | 1×10 <sup>6</sup> | 3×10 <sup>6</sup> | 3×10 <sup>6</sup> |                                                                     |
| 76 | 2.74 | 289  | 287  | 288.12139  | 5×10 <sup>5</sup> | 2×10 <sup>7</sup> | 2×10 <sup>5</sup> |                                                                     |
| 77 | 2.84 | 430  | 428  | 429.59822  | 3×10 <sup>4</sup> | 5×10 <sup>4</sup> | nd                |                                                                     |
| 78 | 2.92 | 297  | 295  | 296.14736  | 2×10 <sup>8</sup> | 5×10 <sup>7</sup> | 2×10 <sup>7</sup> | 314.18057 [M + NH <sub>3</sub> + H] <sup>+</sup>                    |
| 79 | 2.92 | 1440 | 1438 | 1439.71760 | 5×10 <sup>5</sup> | 3×10 <sup>7</sup> | 1×10 <sup>6</sup> | 720.86316 [M + 2H] <sup>2+</sup> ; 718.84860 [M – 2H] <sup>2-</sup> |
| 80 | 2.98 | 311  | 309  | 310.12599  | 2×10 <sup>8</sup> | 2×10 <sup>8</sup> | 5×10 <sup>7</sup> | 328.15967 [M + NH <sub>3</sub> + H] <sup>+</sup>                    |
| 81 | 3.03 | 217  | 215  | 216.09007  | 2×10 <sup>7</sup> | 1×10 <sup>7</sup> | 8×10 <sup>6</sup> |                                                                     |
| 82 | 3.03 | 273  | 271  | 272.12620  | 2×10 <sup>6</sup> | 6×10 <sup>6</sup> | nd                |                                                                     |
| 83 | 3.21 | 341  | 339  | 340.17302  | 4×10 <sup>8</sup> | 2×10 <sup>8</sup> | 3×10 <sup>7</sup> | 358.20670 [M + NH <sub>3</sub> + H] <sup>+</sup>                    |
| 84 | 3.28 | 355  | 353  | 354.15187  | 4×10 <sup>8</sup> | 4×10 <sup>8</sup> | 7×10 <sup>7</sup> | 372.18558 [M + NH <sub>3</sub> + H] <sup>+</sup>                    |
| 85 | 3.29 | nd   | 815  | 816.24794  | 3×10 <sup>5</sup> | nd                | nd                |                                                                     |
| 86 | 3.30 | 386  | nd   | 385.12025  | 1×10 <sup>6</sup> | 5×10 <sup>6</sup> | 3×10 <sup>7</sup> | 771.24628 [2M + H] <sup>+</sup> ; 769.23413 [2M – H] <sup>-</sup>   |
| 87 | 3.46 | 385  | 383  | 384.19998  | 3×10 <sup>8</sup> | 1×10 <sup>8</sup> | 3×10 <sup>7</sup> | 402.23282 [M + NH <sub>3</sub> + H] <sup>+</sup>                    |
| 88 | 3.53 | 544  | 542  | 543.19283  | 6×10 <sup>6</sup> | 2×10 <sup>6</sup> | 9×10 <sup>5</sup> |                                                                     |
| 89 | 3.54 | 399  | 397  | 398.17891  | 4×10 <sup>8</sup> | 4×10 <sup>8</sup> | 1×10 <sup>8</sup> | 416.21155 [M + NH <sub>3</sub> + H] <sup>+</sup>                    |
| 90 | 3.66 | 219  | 217  | 218.11531  | 8×10 <sup>6</sup> | 5×10 <sup>7</sup> | 9×10 <sup>4</sup> |                                                                     |
| 91 | 3.69 | 429  | 427  | 428.22640  | 1×10 <sup>8</sup> | 8×10 <sup>7</sup> | 2×10 <sup>7</sup> |                                                                     |
| 92 | 3.77 | 443  | 441  | 442.20564  | 2×10 <sup>8</sup> | 2×10 <sup>8</sup> | 1×10 <sup>8</sup> | 460.23773 [M + NH <sub>3</sub> + H] <sup>+</sup>                    |
| 93 | 3.80 | 406  | 404  | 405.19078  | 6×10 <sup>5</sup> | nd                | nd                |                                                                     |
| 94 | 3.90 | 473  | 471  | 472.25292  | 3×10 <sup>7</sup> | 5×10 <sup>7</sup> | nd                | 490.28571 [M + NH <sub>3</sub> + H] <sup>+</sup>                    |
| 95 | 4.03 | 883  | 881  | 882.45986  | 3×10 <sup>6</sup> | 2×10 <sup>7</sup> | nd                | 1765.91760 [2M + H] <sup>+</sup> ; 1763.91077 [2M – H] <sup>-</sup> |
| 96 | 4.08 | 1085 | 1083 | 1084.04655 | nd                | 7×10 <sup>5</sup> | nd                |                                                                     |
| 97 | 4.09 | 534  | nd   | 533.30479  | 2×10 <sup>7</sup> | 8×10 <sup>7</sup> | 3×10 <sup>7</sup> |                                                                     |
| 98 | 4.96 | 395  | 393  | 394.19960  | nd                | 3×10 <sup>7</sup> | nd                |                                                                     |

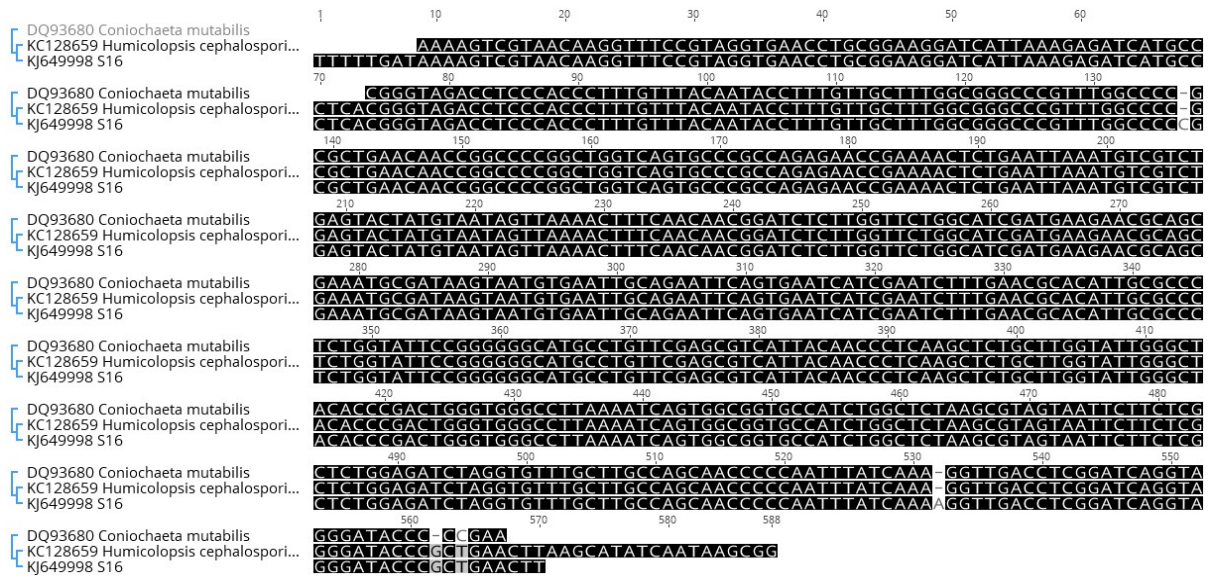

**Figure S1.** Alignment of ITS region of S16 strain (KJ649998) with its best GenBank matches *Coniochaeta mutabilis* (DQ93680) and *Humicolopsis cephalosporioides* (KC128659).

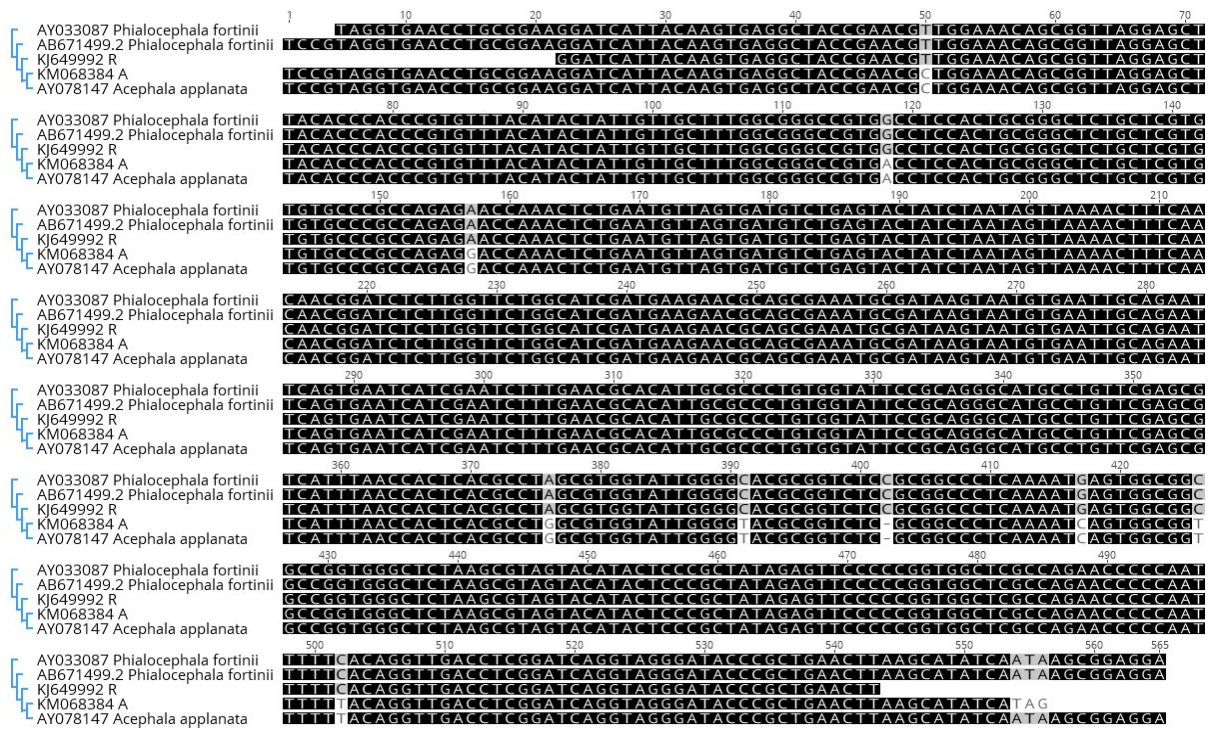

**Figure S2.** Alignment of ITS region of A (KM068384) and R (KJ649992) strains with their best GenBank matches *Acepala applanata* (AY078147) and *Phialocephala fortinii* (AB671499.2 and AY033087), respectively.
